# Supplementary material
Source: publisher site journal article supplement (https://www.dovepress.com/article/supplementary_file/550371/550371%20Revised%20Supplementary%20Table%201.docx)
Supplement: Supplementary file 1 [file 550371%20Revised%20Supplementary%20Table%201.docx]

Supplementary Table 1: Supplementary data (updated from clinicaltrials.gov on 27th June 2025)

| **NCT Number** | **Study Title** | **Brief Summary** | **Conditions** | **Interventions** | **Primary Outcome Measures** | **Phases** | **Enrolment** | **Study Type** |
| --- | --- | --- | --- | --- | --- | --- | --- | --- |
| **NCT00120250** | Eszopiclone for Sleep Disturbance and Nightmares in Post-Traumatic Stress Disorder | The purpose of this study is to obtain data investigating the safety and efficacy of eszopiclone for the treatment of post-traumatic stress disorder (PTSD)-related sleep disturbance and the impact of improved sleep with eszopiclone treatment on neuroendocrine correlates of PTSD. The investigators hypothesize that eszopiclone will be significantly more effective than placebo and well tolerated for PTSD-related sleep disturbance, improvement in sleep will be associated with improvement in overall PTSD symptoms, and patients with PTSD-related sleep disturbances will have abnormal levels of stress hormones. | Post-Traumatic Stress Disorders | DRUG: Eszopiclone | Short PTSD Rating Interview (SPRINT), The SPRINT is a 8-item, clinician-administered scale assessing core and related symptoms of PTSD. Symptoms are rates on 5 point scales from 0 (not at all) to 4 (very much) where a higher value indicates a worse outcome., 8 weeks|Pittsburgh Sleep Quality Index (PSQI), The PSQI is a 24-item, patient-administered scale that assess changes in sleep symptomatology. The total PSQI score ranges from 0 to 21 where a higher value indicates a worse sleep symptomatology., 8 weeks | PHASE4 | 27 | INTERVENTIONAL |
| **NCT00560612** | Secondary Prevention With Paroxetine vs. Placebo in Subthreshold Posttraumatic Stress Disorder (PTSD) | The purpose of this study is: 1) To document the effectiveness and tolerability of paroxetine for the treatment of subthreshold posttraumatic stress disorder (PTSD) in veterans in the early post-deployment period; and 2) To determine the potential efficacy of paroxetine in preventing the progression of anxiety symptoms to PTSD and other anxiety disorders, and improving overall veteran function. | Stress Disorders, Post-Traumatic | DRUG: Paroxetine|DRUG: Placebo | Change in Clinician Administered PTSD Scale (CAPS) Scores, Mean change scores in posttraumatic stress disorder symptoms. Raw scores may range from 0 (no symptoms) to 136 (severe symptoms; score of 136 is based on the first 17 CAPS items administered).  A reduced CAPS score indicates a reduction in (improvement) PTSD symptoms, while an increase in CAPS score indicates an increase (worsening) in PTSD symptoms. The outcome measure is the change in scores before and after treatment. That is, the baseline and at 12 weeks difference scores., Change in Scores (12 weeks-Baseline) | PHASE4 | 12 | INTERVENTIONAL |
| **NCT00700999** | Brain Markers of Treatment Response in Post-Traumatic Stress Disorder (PTSD) | The purpose of this study is to examine if treatment of post-traumatic stress disorder in combat veterans with paroxetine changes brain responses as measured by functional magnetic resonance imaging and if brain responses can predict who will get better with treatment. | Post-traumatic Stress Disorder | DRUG: Paroxetine | Percent Change in Brain Response Measured by Functional Magnetic Resonance Imaging (fMRI), Mean percent change in brain response in the prefrontal cortex during an emotion reappraisal task in the treatment (paroxetine) group and in the Combat Exposed Control group. Target areas are analyzed from fMRI scans which were completed before participants receive treatment and again after participants received 12 weeks of treatment with paroxetine (20-40mg QD). Combat Exposed Control participants received an fMRI scan after signing initial consent and again 12 weeks later., Baseline and 12 weeks | PHASE4 | 65 | INTERVENTIONAL |
| **NCT01490697** | Developing Memory Reconsolidation Blockers as Novel Posttraumatic Stress Disorder (PTSD) Treatments | Despite substantial therapeutic advances, Posttraumatic Stress Disorder (PTSD) remains difficult to treat. One promising new area of research is in post-reactivation pharmacologic intervention, which is based upon the concept of blockade of memory reconsolidation. Recent animal research suggests that reactivation (retrieval) of a stored memory can return it to a labile (alterable) state from which it must be restabilized in order to persist. This process is called "reconsolidation," and various drugs have been found to block it in animals. This blockade may lead to a weakening of the original memory trace.  The aim of this study is to pilot the effect of mifepristone on physiologic responding during traumatic imagery. Although mifepristone is widely and safely used to cause a medical abortion, it is also a powerful stress hormone receptor blocker. These stress hormones, called glucocorticoids, may enhance memory (re)consolidation. Indeed, a recent study in animals reported that mifepristone blocked reconsolidation of context-conditioned fear in rats.  Reconsolidation blockade is a two-stage process. First, the memory must be destabilized by recalling it. Second, reconsolidation of the memory must be blocked by a drug. Memory traces formed under stressful conditions may resist destabilization and thus are inaccessible to reconsolidation blockers. However, when a reconsolidation blocker was paired with d-cycloserine (DCS) in animals that had been trained under stressful conditions, reconsolidation blockade became successful. These results suggest that DCS promotes the destabilization of resistant memory traces. The traumatic memories of individuals with PTSD may be particularly resistant to destabilization. Therefore, this study will compare mifepristone paired with DCS to placebo controls.  The same script-driven traumatic imagery method validated in previous studies of propranolol in this lab will be used. Briefly, subjects with PTSD will describe their traumatic event during a script preparation session, which will reactivate the memory. They will then receive a) mifepristone and DCS or b) placebo. A week later, they will engage in script-driven mental imagery of their traumatic event while physiologic responses (heart rate, sweating, etc) are measured. This is a pilot study so there are no formal hypotheses. The aim is to estimate effect sizes for mifepristone and to compare them with effect sizes for propranolol from this lab's previous work. | Post-traumatic Stress Disorder | DRUG: Mifepristone|DRUG: d-Cycloserine|DRUG: Placebo-matching Mifepristone|DRUG: Placebo-matching d-Cycloserine (DCS) | Physiological Posttraumatic Stress Disorder (PTSD) Probability as Determined From Psychophysiologic Responses to Traumatic Recollection, The posterior probability of developing PTSD was determined for each participant from a composite of psychophysiological responses to script-driven imagery of traumatic events that included assessments of heart rate response in beats per minute, skin conductance response in microSiemens, and corrugator electromyogram (EMG) responses of the left lateral frontalis facial muscle in microVolts. Responses for the traumatic scripts were averaged and square-root transformed for analysis. Responses during personal traumatic imagery of previously studied individuals with and without current PTSD was used to calculate each participant's posterior probability of being classified as PTSD., 1 week following treatment (Day 14) | PHASE4 | 34 | INTERVENTIONAL |
| **NCT01517711** | Tramadol Extended-Release (ER) for Posttraumatic Stress Disorder (PTSD) | This was a six-week pilot study testing the efficacy of tramadol extended-release (ER) for posttraumatic stress disorder (PTSD). Men and women aged 21-55 years with combat-related PTSD or PTSD resulting from a civilian trauma were recruited. Blinded tramadol ER was begun with a 100 mg daily dose for the first week, with an option to increase to 200 mg/day for the 2nd week. Dose adjustments, using a range of 100-300 mg tramadol ER per day (or 1 to 3 placebo tabs), were permitted thereafter. The primary hypothesis was that tramadol ER 100 to 300 mg every morning for 6 weeks would reduce the symptoms of PTSD relative to placebo. The primary outcome measures were PTSD symptoms as rated by the Clinician-Administered PTSD Scale (CAPS) and Clinicians Global Impressions scale at baseline and weeks one, two, four, and six. | Post-Traumatic Stress Disorder | DRUG: Tramadol|DRUG: Placebo | Clinician-Administered PTSD Scale (CAPS), The Clinician-Administered PTSD Scale (CAPS) is an interview-based measure of severity of PTSD symptoms. A total score is calculated with a range of 0-136, with higher numbers indicating more severe symptoms., Weeks 0 (baseline),1, 2, 4, 6|Clinical Global Impression -- Improvement (CGI-I) -- Subject, The Clinicial Global Impression - Improvement (CGI-I) is a single item rated by a clinician. The range is 1 (very much improved)) to 7 (very much worse)., Week 6, assessing clinician's judgment of change from week 0 to week 6 | PHASE4 | 40 | INTERVENTIONAL |
| **NCT00204737** | Short Course Glucocorticoid Treatment for PTSD | The purpose of this study is to investigate if a 2-wk course of 20mg/day of oral prednisone in addition to standard care will result in reduced PTSD symptoms or symptom severity compared to placebo | Post-traumatic Stress Disorder | DRUG: prednisone|DRUG: placebo | Change in Clinician-Administered PTSD Scale (CAPS), This measure tests the hypothesis that there will be a 30% or greater improvement in the Clinician-Administered PTSD (Post Traumatic Stress Disorder) Scale over the course of the study. CAPS is a 30-item survey with a total possible range of scores from 0-120 where the higher the score, the more severe the symptoms., baseline, 2 weeks, 6 weeks, 12 weeks|Number of Participants Achieving CAPS Response, CAPS response defined as a 30% reduction in CAPS score from baseline., baseline, 2 weeks, 6 weeks, 12 weeks | PHASE4 | 12 | INTERVENTIONAL |
| **NCT02637895** | Vortioxetine for Posttraumatic Stress Disorder | Post-traumatic stress disorder (PTSD) can result from having experienced or witnessed a traumatic event. Patients with PTSD symptoms can sometimes experience symptom relief after treatment with antidepressants; however, few patients experience complete symptom relief. There is a need to develop new treatments for PTSD.  This study will evaluate if 12 weeks of using Vortioxetine relieves PTSD symptoms. Vortioxetine has been approved for the treatment of depression; however, Vortioxetine has not been approved by the Food and Drug Administration for the treatment of PTSD. | Post-Traumatic Stress Disorder | DRUG: Placebo|DRUG: Vortioxetine | Change Clinician Administered PTSD Scale Score, Clinician-Administered PTSD Scale (CAPS-5) has a total score ranging from 0-80 with the higher score indicating greater degree of PTSD symptom severity., Baseline, Up to Week 12 | PHASE4 | 41 | INTERVENTIONAL |
| **NCT03340350** | Minocycline for Treatment of Posttraumatic Stress Disorder in Veterans | The study will evaluate the safety and efficacy of adjunctive minocycline treatment in veterans with PTSD. | PTSD | DRUG: Minocycline | PTSD Symptom Severity, PTSD symptom severity was assessed using total scores on the Past Month version of the Clinician-Administered PTSD Scale for Diagnostic and Statistical Manual of Mental Disorders, Fifth Edition (CAPS-5). Total scores on the CAPS-5 range from 0 to 80, with higher scores indicating greater severity of PTSD symptoms., Baseline and Week 12|Change in C-reactive Protein (CRP) Level, Measure of inflammation, Screening and Week 12|Change in Interleukin 6 (IL-6) Level, Measure of inflammation, Screening and Week 12|Change in Tumor Necrosis Factor Alpha (TNF-α) Level, Measure of inflammation, Screening and Week 12 | PHASE4 | 10 | INTERVENTIONAL |
| **NCT01178671** | Combined Mirtazapine and SSRI Treatment of PTSD: A Placebo-Controlled Trial | The overall goal of this study is to examine the efficacy of the combination of mirtazapine and sertraline in the treatment of posttraumatic stress disorder (PTSD). Sertraline is FDA-approved for PTSD, but it is often not fully effective. The combination of mirtazapine and serotonin reuptake inhibitors like sertraline has appeared highly effective in a related disorder -- depression.  In this study, sixty patients with chronic PTSD will be randomized to treatment with either sertraline + mirtazapine or sertraline + placebo for 12 weeks. Patients who show at least a minimal response after 12 weeks will continue for another 12 weeks on the same treatment. | Posttraumatic Stress Disorder | DRUG: Mirtazapine|DRUG: Sertraline|OTHER: Sugar pill | PTSD Severity, PTSD severity will be measured by the Clinician-Administered Posttraumatic Stress Disorder Scale, from 0 (least severe) to 136 (most severe)., up to 24 weeks|Time to Discontinuation of Study Treatment, up to 24 weeks | PHASE4 | 38 | INTERVENTIONAL |
| **NCT02560389** | Dopamine Enhancement of Fear Extinction Learning in PTSD (1R21MH108753) | The purpose of this study is to investigate a new use for a medication called levodopa (L-DOPA). L-DOPA has been approved for use in Parkinson 's disease, but not for Posttraumatic Stress Disorder (PTSD). L-DOPA is thought to enhance certain cognitive abilities that the investigators believe may be affected among women with PTSD. It is hypothesized that L-DOPA may enhance fear extinction learning to a conditioned fear stimulus. If this is true, L-DOPA may improve outcomes for those undergoing certain types of therapy for PTSD, though that aim is beyond the scope of this project. Additionally, the investigators are testing whether an individual's genetic profile affects how well L-DOPA works to enhance cognitive abilities. | Stress Disorder, Post Traumatic | DRUG: Placebo|DRUG: Levodopa | Galvanic Skin Response, Differential galvanic skin response will be assessed with respect to the conditioned stimulus versus the control stimulus. The investigators will compare, at an aggregate level, the differential galvanic skin response between the placebo, 100 mg, and 200 mg L-DOPA groups., Within 30 days of the MRI | PHASE4 | 103 | INTERVENTIONAL |
| **NCT01605253** | Eszopiclone for the Treatment of Posttraumatic Stress Disorder | The purpose of this study is to determine if eszopiclone relative to placebo (sugar pill) is effective and tolerable for people with posttraumatic stress disorder (PTSD)-related sleep disturbance. The investigators will also examine the impact of treatment on sleep patterns, memory recall bias, and level of inflammatory markers (cytokines). The investigators predict eszopiclone will lead to greater improvement than placebo in measures of PTSD symptoms, memory recall bias, and level of inflammatory markers. | Posttraumatic Stress Disorders | DRUG: Eszopiclone|DRUG: Placebo | Change in Symptoms of Post-Traumatic Stress Disorder (PTSD) Between Baseline and Week 12, The Clinician-Administered PTSD Scale (CAPS) is a highly detailed measure of the presence and severity of the Diagnostic and Statistical Manual of Mental Disorders, 5th Edition (DSM-IV) Post-Traumatic Stress Disorder (PTSD) criteria. The severity score was calculated by adding up the frequency score (scale 0 = "none of the time" to 4 = "most or all of the time") and an intensity score (scale 0 = "none" to 4 = "extreme"), which can then be summed for all 17 symptom questions and/or for the three symptom clusters. Scores range from 0 to 136, where greater than or equal to 80 represents extreme PTSD symptomatology., Between Baseline and Week 12 | PHASE4 | 81 | INTERVENTIONAL |
| **NCT01681849** | Neural Circuits in Women With Abuse and Posttraumatic Stress Disorder | The purpose of this study was to assess the effects of the medication paroxetine on symptoms of posttraumatic stress disorder (PTSD) and the brain in women with a history of PTSD related to childhood abuse. The hypothesis is that paroxetine will result in an improvement in PTSD symptoms accompanied by changes in brain functional response to reminders of childhood trauma. | PTSD | DRUG: Placebo|DRUG: Paroxetine|OTHER: Positron Emission Tomography (PET) Imaging | Mean Clinical Administered PTSD Scale for DSM-IV (CAPS) Score, The CAPS is a 30-item questionnaire of PTSD symptomatology that provides continuous measures of symptom severity and frequency. CAPS-IV total symptom severity score is calculated by summing severity scores for the 17 DSM-IV PTSD symptoms. Each symptom is rated for severity based on frequency and intensity on a scale of 0-4 for a total possible severity score per symptom of 8. Criterion E (items 18-19) is duration of symptoms (minimum of one month to make the diagnosis). Items 20-30 are optional. CAPS score is based on items 1-17, CAPS score has a potential range of 0-136, with higher scores indicating greater severity of PTSD symptoms. CAPS was performed before and after treatment with paroxetine or placebo in PTSD patients., Baseline, End of Study (Up to 52 Weeks) | PHASE4 | 91 | INTERVENTIONAL |
| **NCT01130103** | Combination Treatment for Posttraumatic Stress Disorder (PTSD) After the World Trade Center (WTC) Attack | This randomized controlled trial evaluates efficacy of combined prolonged exposure (PE) and the selective serotonin reuptake inhibitor (SSRI) paroxetine in the treatment of survivors of the World Trade Center (WTC) attacks. | Posttraumatic Stress Disorder | DRUG: Paroxetine|BEHAVIORAL: Prolonged Exposure Therapy | Clinician Administered PTSD Scale (CAPS), PTSD severity, minimum = 0 = no symptoms of PTSD maximum = 136 = extremely severe symptoms of PTSD, Weeks 0,5,10|Number of Participants Who Met Remission Criterion, remission defined as: CAPS less than or equal to 20 and Clinical Global Impression (CGI)-change score=1, Weeks 5,10 | PHASE4 | 37 | INTERVENTIONAL |
| **NCT03008005** | Effects of Delta-9 Tetrahydrocannabinol (THC) on Retention of Memory for Fear Extinction Learning in PTSD: R61 Study | The goal of this study is to look at how a type of drug called cannabinoids are related to the processing of fear signals, the experience of emotions and fear, and the pattern of activity in the brain that is involved in these processes and how this relates to the development of post-traumatic stress disorder (PTSD). PTSD is an anxiety disorder that occurs after experiencing a traumatic event(s) and is characterized by unwanted memories of the trauma(s) through flashbacks or nightmares, avoidance of situations that remind the person of the event, difficulty experiencing emotions, loss of interest in activities the person used to enjoy, and increased arousal, such as difficulty falling asleep or staying asleep, anger and hypervigilance. The information gained from this study could lead to the development of new treatments for persons who suffer from anxiety or fear-based disorders. | PostTraumatic Stress Disorder | DRUG: Placebo Oral Capsule|DRUG: Dronabinol Cap 5 milligrams (MG)|DRUG: Dronabinol Cap 10 milligrams (MG) | Brain Measures, Mean functional magnetic resonance imaging (fMRI) BOLD activation extracted from each region of interests \[amygdala; ventromedial prefrontal cortex; hippocampus\] for each stimulus type (CS+E, CS+U, CS-). The units of BOLD values are expressed as arbitrary units., Brain measures are collected on Visit 3, 14 days from baseline (Visit 1), Visit 4, 15 days from baseline (Visit 1), and Visit 5, 21 days from baseline (Visit 1), for approximately 1.5 hours each day|Expectancy Ratings, To assess the expected likelihood that an aversive cue (e.g. noise burst) will occur or not based on the CS shown on the screen. Participants rate their expectancy of the aversive cue using a button box on a scale from 1 to 3 \[1 = certain that the aversive cue will be presented (Yes); 2 = certain that the aversive cue will not be presented (No); 3 = uncertain whether the aversive cue will be presented (I don't know)\]. Counts of "yes", "no", and "I don't know" are collected on the first (early) trial of the CS and the last (late) trial of the CS., Collected on Visit 2, 7 days from baseline (Visit 1), Visit 3, 14 days from baseline (Visit 1), Visit 4, 15 days from baseline (Visit 1), and Visit 5, 21 days from baseline (Visit 1) during the task. Each day the task lasts approximately 20 minutes. | PHASE4 | 46 | INTERVENTIONAL |
| **NCT02199652** | Reducing Suicidal Ideation Through Treatment of Nightmares-Post Traumatic Stress Disorder (PTSD) | Patients with PTSD, and frequent nightmares, and mild-moderate suicidal ideation, who are already taking a Selective Serotonin Reuptake Inhibitor (SSRI) or Serotonin Norepinephrine Reuptake Inhibitor (SNRI) will be randomized to either prazosin or placebo. The investigators hypothesize that patients receiving prazosin will have a greater reduction in suicidal ideation. | Post Traumatic Stress Disorder|Suicidal Ideation|Nightmares | DRUG: Prazosin|DRUG: Placebo | Change Score for Scale for Suicide Ideation, There will be data on the Scale for Suicide Ideation collected at the end of each week of treatment up to 8 weeks. Our apriori primary outcome is the change score in Scale for Suicide Ideation from baseline to the last observation.  This is a self report scale, with 19 items which measure present suicidality, each scored 0-2.  The total scale has a range from 0-38, with higher scores being worse, change score from baseline to last observation, up to 8 weeks | PHASE4 | 20 | INTERVENTIONAL |
| **NCT00292370** | Quetiapine Augmentation for Treatment-resistant PTSD | The purpose of this study is to compare the response of veterans with PTSD without an optimal response to paroxetine to quetiapine augmentation versus placebo. | Combat Disorders|Stress Disorders, Post-Traumatic | DRUG: Open Label (OL) Paroxetine|DRUG: Placebo|DRUG: Quetiapine | Change in Clinician-Administered PTSD Scale for DSM-IV Total Score., The Clinician-Administered PTSD Scale for DSM-IV (CAPS) is described in the National Center for PTSD Instruction Manual (November 2000) as a semi-structured clinical interview designed to assess the seventeen symptoms for Post Traumatic Stress Disorder (PTSD) outlined in the DSM-IV, along with five associated features. Ratings are made on a 5 point continuum from the lowest frequency or intensity to the highest. Total CAPS score is a summed score that ranges from 0 to 136 where 0 is asymptomatic and higher scores equal more severe PTSD symptomatology. Also, a change in total CAPS score of 15 points was proposed as clinically significant change., From baseline (week 8) to endpoint (week 16 or termination) | PHASE4 | 124 | INTERVENTIONAL |
| **NCT00725920** | Placebo Controled Clinical Trial Using Topiramate To Treat Posttraumatic Stress Disorder (PTSD) Patients. | The study is 12-week randomized placebo controlled trial compared to topiramate to treat patients with posttraumatic stress disorder, according to DSM-IV criteria.  Patients will receive topiramate or placebo, the dose will start with 25 mg/day and every week 25mg will be increment according to patients tolerance to side effects.  Patients will be evaluated by blind raters using Clinician-Administered PTSD Scale (CAPS), Beck Depression Inventory (BDI) , Beck Anxiety Inventory (BAI), 36-Item Short Form Health Survey (SF-36), Social Adjustment Scale (SAS).  the outcomes will be improvement on Posttraumatic Stress Disorder (PTSD), Depression, Anxiety, quality of life and social adjustment scale according to scales above. | Posttraumatic Stress Disorder | DRUG: Topiramate|DRUG: placebo control group | Clinician Administered Posttraumatic Stress Disorder Scale, The Clinician-Administered PTSD Scale (CAPS) \[33\] : is a structured interview developed to diagnose PTSD and rate its severity. It is comprised of 30-items to assess PTSD-related symptom frequency and severity. Total scores (sum of 3 clusters items) range from 0 to 136, with scores classified as follows: subclinical, from 0 to 19; mild, from 20 to 39; moderate, from 40 to 59; severe, from 60 to 79; extreme, 80 and above.  CAPS has 3 subscales characterized by the sum of all symptoms for each cluster: CAPS 1 (Revivesce/intrusive recolllections, 5 symptoms, score range: 0-28); CAPS 2 (avoidance, 7 symptoms, score range: 0-36); and CAPS 3 (hyperarousal, 5 symptoms, score range: 0-28).  CAPS scoring: each symptom scores range from 0 to 4, plus 0-2 scores for frequency, and 0-2 severity., 12 week | PHASE4 | 35 | INTERVENTIONAL |
| **NCT01524133** | PROlonGed ExpoSure Sertraline | The current research study aims to compare the effectiveness of two proven treatments for posttraumatic stress disorder (PTSD): Prolonged Exposure (PE), sertraline, and their combination. In addition, the investigators are examining predictors of response to these two treatments and how PTSD symptoms, thoughts, and biological factors may be changed by such treatments. Biological mechanisms of change are also examined including emotion processing and regulation in fMRI, HPA axis function, and genetics and genomics. In addition, the investigators will examine acceptability of each treatment and reasons for ending treatment. | Posttraumatic Stress Disorder | DRUG: Sertraline|BEHAVIORAL: Prolonged Exposure Therapy | Posttraumatic Stress Disorder (PTSD) Symptoms as Measured by the Clinician Administered Posttraumatic Stress Disorder Scale (CAPS), Total Score; Range 0-136 with increasing PTSD severity as scores increase, 24 weeks | PHASE4 | 223 | INTERVENTIONAL |
| **NCT01271244** | Effects of Escitalopram on Autonomic Reactivity in Post Traumatic Stress Disorder | The study looked at relationship between escitalopram and heart rate variability and QT variability in veterans with PTSD. | PTSD | DRUG: Escitalopram | High Frequency Heart Rate Variability, Heart rate variability is the standard deviation of successive R-to-R intervals, or variability in time between successive heart beats. Spectral power in the high frequency (HF: 0.15-0.5 Hz) band reflects parasympathetic input, or cardiac vagal function. A natural log (ln) transformation was applied to heart rate variability data to derive the outcome measure., 12 Weeks|QT Interval Variability, QT variability index (QTvi) is a measure of QT variability normalized to heart rate variability. Increased QTvi has been associated with increased sympathetic activity. QTvi was calculated using Berger's formula as the log ratio of QT variability normalized by the squared mean QT interval divided by heart rate variability normalized by the squared mean heart rate. QTvi is normally expressed as a negative value, and a less negative QTvi may reflect increased QT variability or reduced heart rate variability., 12 weeks | PHASE4 | 26 | INTERVENTIONAL |
| **NCT01965366** | Dexamethasone Plus Virtual Reality Exposure Therapy for PTSD | Evidence from preliminary studies suggests that people with PTSD have heightened fear responses and that cortisol suppression reduces this heightened fear. Research has shown the drug dexamethasone (DEX), a cortisol suppressor, reduces the startle response in civilians with PTSD. This current research proposal represents a blinded, randomized, placebo-controlled efficacy study with the goal of determining whether a drug that suppresses the stress hormone cortisol will increase the efficacy of exposure therapy. Specifically, it is proposed that a dose of DEX, given the night before (approximately 10 hours before) each of 5 to 11 individual virtual reality exposure (VRE) therapy sessions, will significantly enhance the rate of response and possibly the efficacy of treatment. Participants will be treated until they have experienced at least a 70% reduction in PTSD symptoms from baseline or up to 12 sessions or until they and their therapist agree treatment should be terminated, a minimum of 6 sessions to a maximum of 12 sessions. Comprehensive multi-modal outcomes will be assessed by independent assessors blind to subject condition on interviews, self-report measures, and psychophysiological measures. Participants will be assessed pre- and post-treatment and at a follow-up of 3, 6 and 12 months to assess long term effects. | PTSD | BEHAVIORAL: Virtual reality exposure therapy|DRUG: 0.5 mg DEX | Change in The Clinician Administered PTSD Scale (CAPS)Scores, The Clinician Administered PTSD Scale (CAPS) provides a diagnostic measure of PTSD and a continuous measure of the severity, frequency, and intensity of the three symptom clusters (intrusion, avoidance, and arousal) and overall PTSD. The assessor combines information about frequency and intensity of an item into a single severity rating. Severity Rating: 0. Absent; 1. Mild / subthreshold;2. Moderate / threshold; 3. Severe / markedly elevated; 4.Extreme / incapacitating. The assessor combines information about frequency and intensity of an item into a single severity rating. CAPS-5 total symptom severity score is calculated by summing severity scores for the 20 DSM-5 PTSD symptoms. Scores may range from 0-80, with a higher score indicating more reported symptoms of PTSD., Baseline and immediate post treatment (up to 12 weeks from baseline) | PHASE4 | 27 | INTERVENTIONAL |
| **NCT02287038** | Atomoxetine in Veterans With Comorbid ADHD/PTSD | The current available treatments for PTSD are not fully effective for cognitive symptoms of PTSD and have high drop-out and poor engagement, two factors found to be most indicative of overall return to functioning for patients with PTSD. The proposed study directly addresses this knowledge gap by conducting a pilot, fixed-dose, randomized, double-blind, placebo-controlled, and cross-over trial using atomoxetine (ATX) as an add-on medication to other therapies to testing the efficacy of ATX in reducing ADHD cognitive symptoms among veterans with comorbid ADHD/PTSD. Successful completion of this pilot clinical trial may build a platform for future large scale double-blind, placebo-controlled studies using either atomoxetine or other cognitive enhancing medications. | Post Traumatic Stress Disorder|Attention Deficit Hyperactivity Disorder | DRUG: Atomoxetine 80 MG | Conners' Adult ADHD Rating Scales-Self-Report: Short Version (CAARS-S:S, Conner et al, 1999), Conners' Adult ADHD Rating Scales-Self-Report: Short Version (CAARS-S:S, Conner et al, 1999): The CAARS-S:S is a 26-item questionnaire that assesses symptoms of ADHD in persons aged 18 years or older. T-scores above 65 indicate a likelihood of moderate to severe ADHD symptoms and impairment. The range for the CAARS-S:S is from 0 to 78. A score of 78 would resemble the worst symptoms of ADHD with a score 0 having no symptoms., Visit 1, (Day1), Visit 4(Day 36), Visit 7 (Day 71)|The Adult ADHD Quality of Life-29 (AAQOL-29, Brod et al, 2006), The Adult ADHD Quality of Life-29 (AAQOL-29, Brod et al, 2006): AAQoL-29 is a 29-item questionnaire designed to assess quality of life and was a secondary efficacy measure in this trial. It is a participant-reported outcome measure used to examine disease specific functional impairments and quality of life for adults with ADHD. The AAQoL is scored as an overall total score, measuring Life Productivity, Psycholofical Health, Relationship, and Life Outlook. Each item is rated by patients on a 5-point Likert scale ranging from "Not at all/Never" (1) to "Extremely/Very Often" (5). To derive overall scores, item scores are transformed to a 0-100-point scale (1=0; 2=25; 3=50; 4=75; 5=100). Then, the item scores are summed up and divided by item count to generate overall scores. The score range from 0 to 100. A higher score indicates greater QoL and better functioning., Visit 1 (Day1), 4(Day 36), 7 (Day 71) | PHASE4 | 44 | INTERVENTIONAL |
| **NCT02504931** | Serotonin Selective Reuptake Inhibitor Treatment of Dual Diagnosis Post-traumatic Stress Disorder and Alcohol Problems | The investigators propose to conduct a clinical trial to evaluate sertraline treatment efficacy in a large sample of military veterans with a dual diagnosis of PTSD and Alcohol Use Disorder who are receiving Cognitive and Behavioral Therapy as part of the VA-system's new dual diagnosis program. The study is designed as an efficacy trial of sertraline used as an adjunct to Cognitive Behavioral Therapy (CBT) in the treatment of PTSD/Alcohol dual diagnosis. There are two outcomes of interest, namely PTSD symptom improvement and also decreased alcohol consumption. The investigators are interested to know whether or not sertraline is superior to placebo in improving the symptoms of either one or both of these two disorders. Even though sertraline is a treatment of choice for PTSD, the investigators expect that the comorbid condition of alcohol dependence will complicate the treatment of PTSD and that the clustered subgroups will show differential treatment response with sertraline. The primary objective of the present study is to identify subgroups of alcohol dependent persons with PTSD who will either benefit or not benefit from treatment with SSRI's. The proposed study will enroll veterans with PTSD and dually-diagnosed alcohol dependence in a 12-week treatment providing sertraline vs. placebo medication as an adjunct to manualized CBT and will specifically test the hypothesis that subtypes of alcohol dependence can be used to predict which patients respond well and which subgroup responds poorly to SSRI treatment. | PTSD|Alcohol Use Disorder | DRUG: Sertraline|DRUG: Placebo | Percent Heavy Drinking Days, Number of heavy drinking days in a 12 week period is reported by subjects and the percentage is calculated., 12 weeks | PHASE4 | 49 | INTERVENTIONAL |
| **NCT02849548** | Suvorexant and Sleep's Benefits to Therapeutic Exposure for Posttraumatic Stress Disorder | The purpose of this study is to examine effects of blocking the orexin system with suvorexant after exposure-based intervention for posttraumatic stress disorder (PTSD) on sleep, PTSD symptoms, and intersession habituation. | Posttraumatic Stress Disorder | DRUG: suvorexant|OTHER: placebo | The Clinician Administered PTSD Scale for DSM-5 (CAPS-5) Score at Week 2, A structured clinical interview used to assess posttraumatic stress disorder (PTSD) symptom severity for the preceding week. Items are scored on a 5-point scale, and a total score is obtained by summing the 20 symptom items, with higher scores indicating greater PTSD symptom severity. The total scores range from 0 - 80., 2 weeks | PHASE4 | 27 | INTERVENTIONAL |
| **NCT00302107** | A Placebo-Controlled Study of Mirtazapine for PTSD | Objective: To study the efficacy and tolerability of mirtazapine (Remeron) in the treatment of PTSD.  Research Design: This is an 8-week randomized, double-blind, placebo-controlled treatment trial of mirtazapine for the treatment of PTSD as defined on the Clinical Assessment of PTSD Scale (CAPS).  Methodology: After signing an informed consent and meeting all inclusion/exclusion criteria, the patient is randomized to either mirtazapine versus placebo for 8-week duration. During the study a pharmacist maintains the randomization log and verifies the order for the placebo or mirtazapine in look-a-like tablets. Patients' symptoms, side effects and compliance are assessed bi-weekly. Based on symptomology and occurrence of side effects, the investigator increases the medication in 15 mg increments, as tolerated, until a maximum therapeutic benefit is achieved, not to exceed 45 mg/day. The dosing is at bedtime. Compliance is assessed by bi-weekly pill count at week 4 and week 8. Patients are given supportive clinical management during the clinic visits. An investigator is available by telephone 24 hrs a day in case of emergency. Patients may be seen more often if needed. Efficacy will be measured by the following assessment scales: Montgomery-Asberg Depression Rating Scale (MADRS), Hamilton Anxiety Scale (Ham-A), Clinical Global Impression Severity of Illness (CGI-s), Clinical Global Impression of Improvement (CGI-I), Global Assessment of Functioning (GAF), CAPS, Treatment Outcome PTSD rating scale (TOP-8), and Davidson Trauma Scale (DTS).  Clinical Significance: Mirtazapine has shown promise in treating PTSD in an open label trial. This study is the next step in proving mirtazapine's efficacy in treatment of PTSD. | Anxiety|PTSD | DRUG: Mirtazapine|DRUG: Placebo | Structured Interview of Posttraumatic Stress Disorder (SIP), Structured Interview of Posttraumatic Stress Disorder (SIP) is a 17-item clinician-administered scale for PTSD based on Diagnostic Statistical Manual-IV criteria. The SIP has excellent test-retest reliability (0.89; p=.00001), and internal consistency (Conbach α of 0.80). The SIP showed significant correlations with the DTS (r=0.67, p=.0001) and the Impact of Event Scale (r=0.49 p=.0001). Relative to the SCID diagnosis of PTSD, sensitivity, specificity, positive predictive value, negative predictive value, and efficiency values were 100% for all indices using a score of 20 on the SIP. Items are scored on a scale from 0-4 which are summed to yield a total score ranging from 0 to 68 (higher score means more symptomatic or worse outcome). A symptom is counted as positive if it is at least a 2 (moderate)., Primary outcome is measured at baseline and week 8 (primary endpoint) with primary outcome change scores calculated as week 8 minus baseline score. | PHASE4 | 78 | INTERVENTIONAL |
| **NCT01087736** | Topiramate Treatment of Alcohol Use Disorders in Veterans With Post Traumatic Stress Disorder (PTSD): A Pilot Controlled Trial of Augmentation Therapy | The proposed project aims to:  1. Obtain a preliminary assessment of the efficacy of topiramate treatment in reducing alcohol use in veterans with Post Traumatic Stress Disorder (PTSD) and alcohol dependence;  2. Obtain preliminary assessments of safety/tolerability of topiramate in these patients;  3. Assess the feasibility of recruitment and retention for topiramate treatment in this comorbid population; and 4) to inform the design of a planned subsequent larger controlled trial of topiramate.  PRIMARY HYPOTHESIS: Topiramate treatment combined with Medical Management alcohol counseling will be associated with a significant decrease in percent drinking days from baseline to end of treatment.  SECONDARY HYPOTHESIS: There will be significantly less percent drinking days in the topiramate treatment group compared to the placebo group. | PTSD|Alcohol Abuse|Alcoholism | DRUG: Topiramate|OTHER: Placebo administration | Percent Drinking Days (%DD), Alcohol consumption was assessed at baseline and weekly during the treatment phase (12 weeks) using the Time Line Follow Back (TLFB) interview which yields number of days of alcohol use (DD).  DD: day on which alcohol was consumed Standard alcoholic drink defined as containing 13.6 g of pure alcohol., Weekly, weeks 1-12, average | PHASE4 | 30 | INTERVENTIONAL |
| **NCT01587118** | An Open Label Pilot Study of Adjunctive Asenapine for the Treatment of Posttraumatic Stress Disorder | This is an open-label pilot study of adjunctive asenapine for the treatment of Posttraumatic Stress Disorder (PTSD) in veterans who have not fully remitted to an adequate trial of standard antidepressant treatment. | Posttraumatic Stress Disorder | DRUG: Adjunctive asenapine | Change From Baseline in Clinical Administered PTSD Scale (CAPS) Total, CAPS is the clinician rating of posttraumatic stress disorder (PTSD) symptoms; higher scores indicate higher severity of PTSD; 17-item score range 0 to 136. Blake DD, Weathers FW, Nagy LM, et al. The development of a Clinician-Administered PTSD Scale. J Trauma Stress 1995; 8:75-90., baseline, week 4, 8, and 12 | PHASE4 | 18 | INTERVENTIONAL |
| **NCT00182078** | A Study of Sertraline to Prevent PTSD | The broad, long-term objectives of this proposal are to prevent the emergence of posttraumatic stress and depressive symptoms in children admitted for an acute burn, reconstructive surgery, or non-burn injury. This study is investigating the early use of a medication in the prevention of posttraumatic stress disorder and depression. Specific Aims 1 and 2: To assess the efficacy of sertraline to prevent the development of (Aim 1)posttraumatic stress disorder and (Aim 2)depression in children aged 6-20, after burn or non-burn injury or after reconstructive surgery. Hypotheses 1 and 2: Administration of sertraline after an acute burn or non-burn injury, or after reconstructive surgery will lead to greater reduction in post-traumatic and depressive symptoms over 12 and 24 weeks, compared with placebo.  This study is completing the evaluation of 90 children and adolescents, aged 6-20 years. It is comparing 60 subjects receiving sertraline with 30 placebo control subjects matched for age, severity of injury, and type of hospitalization (acute vs. reconstructive). Children and families are evaluated for the presence of acute stress symptoms. Children are reassessed in a double-blind placebo-controlled design, with evaluations at Baseline, Week 2, Week 4, Week 8, Week 12, and Week 24. In addition, there is weekly monitoring for the first 14 weeks of the study and again at 18 weeks (the midpoint of the study). At each reassessment, information is collected on the child's compliance with the study medication, the parents' assessment of the child's functioning, and the child's self-report of posttraumatic and depressive symptomatology. The main outcome variable used in this study is the child's posttraumatic symptoms. | Posttraumatic Stress Disorder|Depression | DRUG: Placebo|DRUG: Sertraline | Diagnostic Interview Schedule for Children and Adolescents (DICA) - Parent, The DICA is a semi-structured interview, and was used to measure post Traumatic Stress Disorder (PTSD) symptoms in children. The DICA was administered to parents who were English-speaking. A minimum total score of 7 and a maximum total score of 18 is required to meet criteria for PTSD. A higher score is indicative of increased PTSD symptoms. Changes in scores from Baseline to Week 24 were examined., Baseline to Week 24|Diagnostic Interview for Children and Adolescents (DICA) - Child, The DICA is a semi-structured interview, and was used to measure Post Traumatic Stress Disorder (PTSD) symptoms in children. The DICA was administered to children who were English-speaking. A minimum total score of 7 and a maximum total score of 18 is required to meet criteria for PTSD. A higher score is indicative of increased PTSD symptoms. Changes in scores from Baseline to Week 24 were examined., Baseline to Week 24 | PHASE4 | 26 | INTERVENTIONAL |
| **NCT01749215** | A Controlled Trial of Topiramate Treatment for Alcohol Dependence in Veterans With PTSD | The goal of this project is to improve the treatment of veterans with co-occurring alcohol dependence and posttraumatic stress disorder (PTSD). The PI and co-investigators will conduct a controlled clinical trial of topiramate for the treatment of these co-occurring disorders. | Alcohol Dependence|Posttraumatic Stress Disorder (PTSD) | DRUG: Topiramate|DRUG: placebo|BEHAVIORAL: Medical Management | Change in Percentage of Heavy Drinking Days Over the 12 Weeks of Study Treatment as Assessed by the Timeline Followback (TFLB), Timeline Followback (TLFB) data was recorded using a calendar, with participants providing retrospective reports of daily drinking over the past week(s). The percent of heavy drinking days per week was calculated from the calendar data. The change in percentage of heavy drinking days was calculated by subtracting Week 0 (baseline) data from Week 12. Negative scores indicate improvement., Baseline to Week 12 | PHASE4 | 151 | INTERVENTIONAL |
| **NCT00158262** | Effect of Propranolol on Preventing Posttraumatic Stress Disorder | This study will assess the effectiveness of taking propranolol soon after a traumatizing incident in reducing the incidence and severity of posttraumatic stress disorder in acutely traumatized individuals. | Post-Traumatic Stress Disorder | DRUG: Propranolol|DRUG: Placebo | Physiological Posterior Probability of Posttraumatic Stress Disorder (PTSD) as Determined From Psychophysiologic Responses During Script-Driven Mental Imagery at Month 1, The posterior probability of developing PTSD was determined for each participant from a composite of psychophysiological responses during script-driven mental imagery of traumatic events (two exemplars) that included assessments of heart rate response in beats per minute, skin conductance response in microSiemens, and corrugator and left lateral frontalis facial muscle electromyogram (EMG) responses in microVolts. Responses for the two traumatic scripts were averaged and square-root transformed for analysis. Responses during personal traumatic imagery of previously studied individuals with and without current PTSD were used to calculate each participant's posterior probability of being classified as PTSD., Month 1|Physiological Posterior Probability of PTSD as Determined From Psychophysiologic Responses During Script-Driven Mental Imagery at Month 3, The posterior probability of developing PTSD was determined for each participant from a composite of psychophysiological responses during script-driven mental imagery of traumatic events (two exemplars) that included assessments of heart rate response in beats per minute, skin conductance response in microSiemens, and corrugator and left lateral frontalis facial muscle electromyogram (EMG) responses in microVolts. Responses for the two traumatic scripts were averaged and square-root transformed for analysis. Responses during personal traumatic imagery of previously studied individuals with and without current PTSD were used to calculate each participant's posterior probability of being classified as PTSD., Month 3 | PHASE4 | 43 | INTERVENTIONAL |
| **NCT00674570** | Veteran Stress and Learning Study | This is a research study examining the use of two medications, Hydrocortisone and D-Cycloserine, compared to an inactive substance (placebo), on their ability to reduce fear responses and memory of fear in Veterans with symptoms of Posttraumatic Stress Disorder (PTSD). These responses will be tested using a fear learning and memory task administered by computer. | Stress Disorders, Posttraumatic | DRUG: Hydrocortisone|DRUG: D-Cycloserine|DRUG: Placebo | Proportion of Maximum Skin Conductance Response (SCR) in Microsiemens (µS), Psychophysiology measurements occurred on day 7 for fear conditioning, day 9 for fear extinction, and day 11 for extinction retention. The primary outcome measures are presented for the first and last conditioned stimulus (CS) trials during fear conditioning and extinction and for the first 2 trials during retention. Conditioned Responses (CR): An SCR score was obtained for each CS by subtracting the mean skin conductance level (SCL) in microsiemens (µS) for the 2-s interval immediately preceding CS onset from the max SC level in µS during the 8-s CS presentation. Unconditioned Response (UCR): An SCR score for the UCR was obtained by subtracting the mean SCL in µS within 6-8 s following CS offset from the max increase in SC level during the .5-6.5 time interval following the CS offset, corresponding to the onset of the .5s US. SC responses were range corrected using each participant's maximum response to the UCS or CS during acquisition trials of the fear conditioning phase., 15 minute measurement intervals on Study Days 7, 9, and 16 | PHASE4 | 111 | INTERVENTIONAL |
| **NCT01631682** | Pilot Study of Pharmaceutical and Behavioral Interventions to Treat Anxiety Disorders | The aim of this project is to create fear conditioning paradigm within which the relative strengths of various novel pharmacological and behavioral interventions can be tested. These interventions are intended to reduce the fearfulness associated with fear conditioning by blocking a memory process known as reconsolidation. In fear conditioning, a "conditioned" stimulus (CS) is paired with an aversive "unconditioned" stimulus (US) such as an electric shock, until presentation of the CS alone comes to elicit a fear conditioned response (CR). The investigators hypothesize that by using a more highly prepared CS (i.e. video of spiders); more sensitive subjects (individuals with stronger acquired CRs); and additional experimental probes for the presence of the latent CR, the investigators may develop a normal human paradigm that is not plagued by previously observed floor effects (i.e. intervention is 100% effective), within which both the established techniques of propranolol and delayed extinction will produce significant, but only partial, CR reduction. This would leave room to test and compare potentially more powerful candidate reconsolidation-blocking or memory-updating interventions. To achieve these aims, subjects will undergo a four-day fear conditioning and delayed extinction protocol. Skin conductance response data will be gathered across the different phases of the experiment. | Posttraumatic Stress Disorder|Anxiety Disorder | DRUG: Propranolol|BEHAVIORAL: Reactivation|DRUG: Mifepristone|DRUG: Intranasal oxytocin | Change From Baseline Skin Conductance Response, Skin conductance response (SCR) is the change in skin conductance level in response to a stimulus. We compared the SCR to a non-treated conditioned stimulus (CS+N) with the SCR to a treated conditioned stimulus (CS+R) by creating a difference score (CS+R - CS+N) for the day 3 data. Day 3 is 48 hours after the fear-conditioning procedure and serves as the primary measure of whether the treatment had an effect. SCR was measured in microSiemens; the SCR difference score reflects a change in microSiemens., 48hrs | PHASE4 | 186 | INTERVENTIONAL |
| **NCT04188392** | Pimavanserin for Insomnia In Veterans With Posttraumatic Stress Disorder | This preliminary, open-label study assesses the feasibility of 34mg at bedtime for 6 weeks in Veterans with Posttraumatic Stress Disorder and insomnia. | Post-traumatic Stress Disorder|Insomnia | DRUG: Pimavanserin | Recruitment Rates, The rate of enrollment per month; goal of 6 subjects total, Total duration of recruitment time (5.8 months)|Retention Rates, The number of subjects who complete the protocol in its entirety; goal of 75% of subjects enrolled into treatment, 10 weeks (overall study) | PHASE4 | 6 | INTERVENTIONAL |
| **NCT00821678** | Telemedicine Outreach for Post Traumatic Stress in CBOCs | The purpose of this study is improved outcomes for veterans with Post Traumatic Stress Disorder (PTSD) treated in small VA Community Based Outpatient Clinics (CBOCs). Although psychotherapy and pharmacotherapy treatments for PTSD have been proven to be efficacious in controlled trials, geographic barriers often prevent veterans from accessing these evidence-based treatments. Telemedicine technologies will be used to overcome geographic barriers to care. Specifically, we will evaluate the Telemedicine Outreach for PTSD (TOP) intervention which is based on the principals of the Chronic Care Model and Disease Management, and builds on the evidence base of quality improvement for depression in primary care settings. The TOP intervention will employ an off-site PTSD care team (tele-psychiatrist, tele-psychologist, tele-pharmacist, and tele-nurse care manager) and will use telemedicine technologies (telephone, interactive video and electronically shared medical records) to treat CBOC patients with a newly emerging or chronic PTSD. We hypothesize that study participants randomized to the TOP intervention will receive higher quality of care and experience better outcomes compared to study participants randomized to treatment as usual. | Posttraumatic Stress Disorder | OTHER: Telemedicine Outreach for PTSD | Change in PTSD Symptom Severity (PDS), range - 0-51 (higher score represents greater severity), Baseline, 6 months | PHASE4 | 265 | INTERVENTIONAL |
| **NCT00709735** | A Psychophysiologic Study of Weakening Traumatic Combat Memories With Post-Reactivation Propranolol | The consolidation of learning is enhanced by adrenalin and other stress hormones. This memory enhancing effect is opposed by propranolol. In posttraumatic stress disorder (PTSD), a psychologically traumatic event may overstimulate stress hormones such as adrenalin, which in turn overly strengthen consolidation of the memory of the event, leading to an excessively powerful and persistent memory. Administration of propranolol after a psychologically traumatic event could reduce subsequent PTSD. Unfortunately, there exists a window of opportunity for influencing the consolidation of a traumatic event into long-term memory. In persons who have already developed PTSD, this would have closed months or years earlier. However, recent developments in animal research suggest that reactivation (retrieval) of a consolidated memory can return it to a labile state, from which it must be restabilized in order to persist. This process, which has been termed "reconsolidation," can be reduced in animals by propranolol.  In a preliminary study performed by the PI and colleagues in Canada, civilian participants with PTSD described the traumatic event during a script preparation session, which served to reactivate their traumatic memory. They then received either propranolol or placebo. A week later, during script-driven imagery of their traumatic events, physiologic responses were smaller in the participants who had received post-reactivation propranolol compared to placebo, suggesting that the traumatic memory had been weakened by the propranolol. These results suggest that that post-reactivation propranolol recapitulates its effects on consolidation, this time by blocking reconsolidation of the traumatic memory.  Several important questions remain unanswered. First, does propranolol also weaken traumatic memories in combat-related PTSD? Second, does this weakening effect only occur when the propranolol is given after combat memory reactivation? If not, this would refute the reconsolidation hypothesis and suggest that propranolol affects non-specific mechanisms. Third, how long does the traumatic memory weakening last?  The proposed project will investigate these questions by performing an improved, double-blind, placebo-controlled study in Iraq and Afghanistan veterans with combat-related PTSD. Participants will be randomly assigned to one of two groups: post-reactivation propranolol or non-reactivation propranolol. Participants in the non-reactivation propranolol group will receive propranolol in the absence of traumatic memory reactivation. Participants randomized to the post-reactivation propranolol group will receive matching placebo capsules. Two days later, all participants will return for a script preparation session, at which time they will describe the details of their traumatic event. Participants randomized to the post-reactivation propranolol group will then receive propranolol, whereas participants randomized to the non-reactivation propranolol group will receive placebo. Participants will then return for psychophysiologic script-driven imagery testing one week and six months later. We hypothesize that those who receive propranolol after reactivation of their memories of their traumatic combat event(s) will show significantly smaller psychophysiologic responses during script-driven imagery testing compared to participants who receive propranolol in the absence of combat memory reactivation, supporting the inference that post-reactivation propranolol blocks the reconsolidation of traumatic combat memories. | Posttraumatic Stress Disorder | DRUG: Propranolol|DRUG: Placebo | Physiological Posterior Probability of Posttraumatic Stress Disorder (PTSD) as Determined From Psychophysiologic Responses During Script-Driven Traumatic Memory Recollection, The posterior probability of developing PTSD was determined for each participant from a composite of psychophysiological responses during script-driven imagery of traumatic combat events that included assessments of heart rate response in beats per minute, skin conductance response in microSiemens, and corrugator and left lateral frontalis facial muscle electromyogram (EMG) responses in microVolts. Responses for the two traumatic scripts were averaged and square-root transformed for analysis. Responses during personal traumatic imagery of previously studied individuals with and without current PTSD was used to calculate each participant's posterior probability of being classified as PTSD., Day 8 | PHASE4 | 23 | INTERVENTIONAL |
| **NCT05604794** | A Retrospective Effectiveness Trial of Ketamine-Assisted Psychotherapy in Adult Patients Coping With Mental Health | Ketamine-Assisted Psychotherapy (KAP) is a relatively new approach for the treatment of mental health issues, which involves the combination of ketamine, a dissociative anaesthetic with psychedelic properties, and psychotherapy to promote emotional wellbeing. In this study, we investigated the effectiveness of KAP in adult patients coping with mental health. We predicted that clients would experience lasting reductions in psychological distress over time, such as depression, anxiety, and post traumatic stress, that would be detectable up to 6 months after treatment. The results of this study may provide evidence of sustained real-world effects of Ketamine-Assisted Psychotherapy, of interest to patients, clinicians, researchers, and policymakers. | Depression|Anxiety|Post Traumatic Stress Disorder | COMBINATION_PRODUCT: Ketamine-Assisted Psychotherapy (KAP) | 9-item Patient Health Questionnaire (PHQ-9), Self-reported measure of depression, ranging from 0-27. Higher scores are worse., Change from 3 months compared to baseline|7-item Generalized Anxiety Disorder Measure (GAD-7), Self-reported measure of anxiety, ranging from 0-21. Higher scores are worse., Change from 3 months compared to baseline|6-item PTSD Checklist (PCL-6), Self-reported measure of post traumatic stress, ranging from 6-30. Higher scores are worse., Change from 3 months compared to baseline | PHASE4 | 1806 | INTERVENTIONAL |
| **NCT00006489** | Treatment for Alcoholism and Post-Traumatic Stress Disorder (Naltrexone) | This study will evaluate naltrexone and cognitive-behavioral therapy treatments for alcohol dependence and post-traumatic stress disorder (PTSD). Subjects will be randomly assigned a 6-month treatment of either: 1) naltrexone alone, 2) naltrexone with PTSD psychosocial therapy, 3) a placebo with PTSD psychosocial therapy, or 4) placebo alone. An enhanced medication management intervention will accompany all treatment conditions. Follow-up assessments will be completed at 9 and 12 months after treatment. | Alcoholism|Alcohol Dependence|Post-Traumatic Stress Disorder | BEHAVIORAL: Cognitive-Behavioral Therapy|DRUG: Naltrexone|DRUG: Placebo | Posttraumatic Stress Disorder (PTSD) Symptom Scale - Interview (PSS-I-IV), The PSS-I-IV is a clinician-rated interview that evaluates PTSD symptoms on a frequency/severity scale corresponding to the DSM-IV symptom criteria. The measure has a total score range from 0 to 51, with higher scores indicating more severe PTSD symptoms., Week 0 (Pretreatment), Week 24 (Posttreatment), Week 52 (Follow-up)|Drinking Timeline Follow-back Interview (TFBI), The TFBI is an interview that utilizes a calendar method to assess when and how much alcohol was consumed by the participant. At Week 0 (Pretreatment), Week 24 (Posttreatment), and Week 52 (Follow-up), alcohol consumed in the past 90 days was assessed. This measure was then used to calculate the percentage of days drinking in the past 90 days at each time point. Higher scores for percentage of days drinking indicate worse drinking outcomes., Week 0 (Pretreatment), Week 24 (Posttreatment), Week 52 (Follow-up) | PHASE4 | 165 | INTERVENTIONAL |
| **NCT02704754** | Suvorexant and Trauma Related Insomnia | Problems sleeping are common after exposure to highly threatening experiences and can occur with and without a diagnosis of posttraumatic stress disorder (PTSD). Established treatments for PTSD are limited for addressing insomnia and many insomnia treatments appear to be limited in the context of PTSD. Suvorexant is FDA approved for insomnia and among approved drugs has a unique mechanism of action that may be well suited for targetting arousal at night dysregulated by trauma. The investigators will evaluate the efficacy of suvorexant for insomnia that developed in relation to trauma exposure, utilizing a placebo control, and polysomnography to identify biomarkers of response, in a six week trial. | Insomnia|Posttraumatic Stress Disorder | DRUG: suvorexant|OTHER: placebo | Change in Insomnia Severity Index Score From Baseline., A seven-item measure used to evaluate insomnia severity for the preceding two weeks. Items are scored on a 5-point scale and a total score ranging between 0 and 28 is obtained by summing the seven items, with higher scores indicating greater insomnia severity., Baseline score minus 6 weeks or last observation (measure was also obtained at 2 and 4 weeks, the mathematical mean for the "last observation" was 5 weeks). | PHASE4 | 41 | INTERVENTIONAL |
| **NCT02213900** | Preventing Post-Operative Delirium in Patients Undergoing a Pneumonectomy, Esophagectomy or Thoracotomy | The purpose of this study is to investigate the effectiveness of a preventative low-dose of Haloperidol to prevent delirium in patients undergoing a esophagectomy, pneumonectomy or thoracotomy.  Delirium is state of severe confusion and some symptoms include:  * Cannot think clearly  * Have trouble paying attention  * Have a hard time understanding what is going on around them  * May see or hear things that are not there. These things seem very real to them. | Delirium|Cognitive Impairment|Post-traumatic Stress Disorder|Depression|Anxiety | DRUG: Haloperidol|DRUG: Placebo | Efficacy of Low-dose Haloperidol in Reducing Delirium Incidence, Test the efficacy of low dose haloperidol in reducing delirium incidence among patients who are status post esophagectomy, pneumonectomy or thoracotomy compared to placebo., Up to 30 days | PHASE4 | 135 | INTERVENTIONAL |
| **NCT00347269** | Primary Care Intervention Strategy for Anxiety Disorders | This study will compare the effectiveness of an intervention strategy for the treatment of people with post traumatic stress disorder, generalized anxiety disorder, panic disorder, and social anxiety disorder in the primary care setting. | Post-traumatic Stress Disorder|Generalized Anxiety Disorder|Panic Disorder|Social Anxiety Disorder | BEHAVIORAL: Cognitive-behavioral therapy|DRUG: Psychotropic medication optimization|BEHAVIORAL: Treatment as Usual | BSI-12 (Anxiety and Somatization Subscales), 12 items from the Brief Symptom Inventory that measure anxiety and anxiety0related physical symptoms, Measured at Month 18 | PHASE4 | 1004 | INTERVENTIONAL |
| **NCT02965027** | Prazosin for Post-Concussive Headaches | Mild traumatic brain injury (mTBI) caused by blast effects of explosive devices has been called the "signature injury" of soldiers who served in the Iraq and Afghanistan conflicts. mTBI can also occur from impact or hitting the head on an object or the ground. Although termed "mild" in comparison to major brain injuries, people with mTBI can have problems with their memory and concentration. People with mTBI can also find they are more irritable, have more anxiety, and have trouble with their mood and sleep.  The purpose of this study is to see if a medication called prazosin can help treat chronic headaches in people with mTBI. The Food and Drug Administration (FDA) has approved prazosin for treating people with high blood pressure. At this time, the FDA has not approved prazosin in the treatment of mTBI or headaches. Some people who have posttraumatic stress disorder (PTSD) and have been taking prazosin for their medical conditions or who have taken it in research studies have said they have fewer headaches. | Post-Traumatic Headache | DRUG: Prazosin|DRUG: Placebo | Change From Baseline in Headache Frequency, Headache log completed by participant to capture number of headaches experienced., baseline, 4,8, and 12 weeks after steady dose | PHASE4 | 89 | INTERVENTIONAL |
| **NCT00159965** | Treatments for Psychogenic Nonepileptic Seizures (NES) | The investigators propose that treatment of the comorbid disorders (depression, anxiety, and impulsivity) with sertraline in patients with lone psychogenic nonepileptic seizures (NES), will result in a decreased number of NES. The purpose of this study is to provide pilot testing and data to inform the future randomized controlled trial based on the hypothesis. | Convulsion, Non-Epileptic|Conversion Disorder|Depression|Stress Disorders, Post-Traumatic | DRUG: sertraline|DRUG: placebo | Number of Nonepileptic Seizures (NES), psychogenic nonepileptic seizure (NES) frequency, collected prospectively, using a daily seizure calendar; aggregated into biweekly intervals., bi-weekly at baseline and weeks 2, 4, 6, 8, 10, 12 | PHASE4 | 38 | INTERVENTIONAL |
